# Supplementary material for: MicroRNA PC-3p-2869 Regulates Antler Growth and Inhibits Proliferation and Migration of Human Osteosarcoma and Chondrosarcoma Cells by Targeting CDK8, EEF1A1, and NTN1
Source: MDPI journal article supplement (doi:10.3390/ijms241310840), 2023-06-29
Supplement: s1 [file s1]

## Supplementary materials

Table S1. Primers used for RT-qPCR

| Primer name    | Sequence (5'-3')                                       |
|----------------|--------------------------------------------------------|
| miR-PC-2869-RT | GTCGTATCCAGTGCAGGGTCCGAGGTATTCGCACTGGATACGACC<br>CACTG |
| miR-PC-2869-F  | GCGCGCATTGGTGGTT                                       |
| miR-PC-2869-R  | AGTGCAGGGTCCGAGGTATT                                   |
| Hs-U6-F        | TGGAACGATACAGAGAAGATTAGCA                              |
| Hs-U6-R        | AACGCTTCACGAATTTGCGT                                   |
| Ce-U6-F        | CTCGCTTCGGCAGCACA                                      |
| Ce-U6-R        | AATGCTTCACGAATTTGCGT                                   |

miR-PC-2869-RT is the reverse transcription primer. Hs: *Homo sapiens*. Ce: *Cervus elaphus*.

**Table S2.** Synthetic sequences used for cloning

| DNA Oligos       | sequence (5'-3')                                                                                |
|------------------|-------------------------------------------------------------------------------------------------|
| mir-PC-3p-2869-F | ccggGTCCTTCCTGAGCCACTTTCTGTGGAGACCTAGTGCATTCCA<br>AAAAGCCGACGCATTGGTGGTTCAGTGGTAGAATTCTCTTTTTg  |
| mir-PC-3p-2869-R | aattcAAAAAGAGAATTCTACCACTGAACCACCAATGCGTCGGCTT<br>TTTGGAAATGCACTAGGTCTCCACAGAAAGTGGCTCAGGAAGGAC |
| ANKRD6-wt-F      | tcgagAACAGGCTCAGTCAGCATCCTCACCCAGAGATGGCAACATC<br>TATTAAGACCAATGCAATACCTTTTCATCTTCgc            |
| ANKRD6-wt-R      | ggccgcGAAGATGAAAAGGTATTGCATTGGTCTTAATAGATGTTGCC<br>ATCTCTGGGTGAGGATGCTGACTGAGCCTGTTc            |
| ARID5B-wt-F      | tcgagCAGATGGCAAGGGATGCCCTCTTTTTCATAAACTCTCCAA<br>GGTTCAATCAATGCAATGTATAGTGAAACTTgc              |
| ARID5B-wt-R      | ggccgcAAGTTTCACTATACATTGCATTGATTGAACCTTGGAGAGTTT<br>TATGAAAAAGAGGGGCATCCCTTGCCATCTGc            |
| ARMCX5-wt-F      | tcgagCTCTGTTCTCATAAAGCCTCAAACAGTTTTTTGGAGTTGCAA<br>TATGAAACCAATGCATATTGTAATTATAAATgc            |

| DNA Oligos  | sequence (5'-3')                                                                      |
|-------------|---------------------------------------------------------------------------------------|
| ARMCX5-wt-R | ggccgcATTTATAATTACAATATGCATTGGTTTCATATTGCAACTCCAA<br>AAAACTGTTTGAGGCTTTATGAGAACAGAGc  |
| BMP3-wt-F   | tcgagTTATTTTTATGGACTTCTTCCTGTTTTTTTTTTTTTTTTTTTGC<br>ACTGCCAATGCATTTTGTTCAAAAGATgc    |
| BMP3-wt-R   | ggccgcATCTTTTGAAACAAAATGCATTGGCAGTGCAAAAAAAAAA<br>AAAAAAAAAACAGGAAGAAGTCCATAAAAAATAAc |
| CDK8-wt-F   | tcgagTGTTGTGGATTTGCTACTTCCATAGTTTACTTGACATGGTTCA<br>GACTGACCAATGCATTTTTTTCAGTGACAGgc  |
| CDK8-wt-R   | ggccgcCTGTCACTGAAAAAATGCATTGGTCAGTCTGAACCATGTC<br>AAGTAAACTATGGAAGTAGCAAATCCACAACAc   |
| COL4A1-wt-F | tcgagATACCAAATGGCACTTTTGATGAAATAAAATATCAATATTTTC<br>TGCAATCCAATGCCTGATGTGTGAAGTGAgc   |
| COL4A1-wt-R | ggccgcTCACTTCACACATCAGTGCATTGGATTGCAGAAAATATTGAT<br>ATTTTATTCATCAAAAAGTGCCATTTGGTATc  |
| EEF1A1-wt-F | tcgagCCATTTAAGTTTAGTAGTAAAAGACTGGTTAATGATAACAATG<br>CATCGTAAAACCTTCAGAAGGgc           |
| EEF1A1-wt-R | ggccgcCCTTCTGAAGGTTTTACGATGCATTGTTATCATTAAACCAGTC<br>TTTTACTACTAACTTAAATGGc           |
| GRIK2-wt-F  | tcgagTTGACAACATTGTGATAACAGTTGAGTGCACACAGTTTGCTG<br>TTTGAATCCAATGCACAAAATTAAAAAAAATgc  |
| GRIK2-wt-R  | ggccgcATTTTTTTTAATTTTGTGCATTGGATTCAAACAGCAAACGT<br>GTGCACTCAACTGTTATCACAATGTTGTCAAc   |
| MBD2-wt-F   | tcgagTGTAAGAAAAAAAATGTACCCGAGCACATAGAGCTTTTTAAT<br>AGCACTAACCAATGCCTTTTTAGATGTATTTgc  |
| MBD2-wt-R   | ggccgcAAATACATCTAAAAAGGCATTGGTTAGTGCTATTAAAAAGC<br>TCTATGTGCTCGGGTACATTTTTTTTCTTACAc  |
| NPAT-wt-F   | tcgagGGGATTTAAAGAATTGCACTAATTCATAGAACTCTTTACATTG<br>TAGTGACCAATGCACATATAATTTAAATCTgc  |

| DNA Oligos   | sequence (5'-3')                                                                       |
|--------------|----------------------------------------------------------------------------------------|
| NPAT-wt-R    | ggccgcAGATTTAAATTATATGTGCATTGGTCACTACAATGTAAAGAG<br>TTCTATGAATTAGTGCAATTCTTTAAATCCCc   |
| NTN1-wt-F    | tcgagTAAATGTTTAGTTGTGACCATGACGTATTGTTTGGGTCAATGT<br>CCCTTTCCAATGCATACTAATATATTATGGgc   |
| NTN1-wt-R    | ggccgcCCATAATATATTAGTATGCATTGGAAAGGGACATTGACCCAA<br>ACAATACGTCATGGTCACAACATAACATTTAc   |
| PURB-wt-F    | tcgagCTTCACTGTAAATTTTGTTCATTTTAAACCAATTATGGTAC<br>TTTATCCAATGCACAACCTGATCTCTCAGTgc     |
| PURB-wt-R    | ggccgcACTGAGAGATCAGTTGTGCATTGGATAAAGTACCATAATTG<br>GGTTAAAAATGAAAACAAAATTTACAGTGAAGc   |
| RNF12-wt-F   | tcgagTTCATTTGTTTAAAAATGTAAAGCTATTTTGTAGAGGCTCAGT<br>ACTTTTCCAATGCACTGTTGTATGAATGCAGc   |
| RNF12-wt-R   | ggccgcTGCATTCATACAACAGTGCATTGGAAAAGTACTGAGCCTCT<br>ACAAAATAGCTTTACATTTTAAACAAATGAAC    |
| SLC35A2-wt-F | tcgagATTTTTTGGTTTGTTCATTTTAAAGGAAGTGAATGAACAAATGTC<br>AGGATATCCAATGCCAAATAAAGATGTTGTgc |
| SLC35A2-wt-R | ggccgcACAACATCTTTATTTGGCATTGGATATCCTGACATTTGTTTCAT<br>TACAGTTCCTTAAAAAACAAACCAAAAAATc  |
| SRGAP1-wt-F  | tcgagGACATATGTCATTTTAAAGGACAATAGAAACACTTAGACTTACT<br>TGAAAATCCAATGCTGCACCACTTGTAATGgc  |
| SRGAP1-wt-R  | ggccgcCATTACAAGTGGTGCAGCATTGGATTTTCAAGTAAGTCTAA<br>GTGTTTCTATTGTCCTTAAAATGACATATGTCc   |
| TANC2-wt-F   | tcgagGGTTTTCTATGACTCAGATGTAAAGGACTTTCTCTGTACAGTA<br>TATTATCCAATGCATGTTTGTCTCTCTCCgc    |
| TANC2-wt-R   | ggccgcGGAGAGAGAAACAAACATGCATTGGATAATATACTGTACAGA<br>GAAAGTCCTTTACATCTGAGTCATAGAAAACCCc |
| TRPS1-wt-F   | tcgagGTAGCACATTATGTTTATAATTGCACATGTGCACATAATCTATT<br>ATGATCCAATGCAAATACAGCTCCAAAAAGc   |

| DNA Oligos   | sequence (5'-3')                                                                       |
|--------------|----------------------------------------------------------------------------------------|
| TRPS1-wt-R   | ggccgcTTTTTGGAGCTGTATTTGCATTGGATCATAATAGATTATGTGC<br>ACATGTGCAATTATAAACATAATGTGCTACc   |
| UBR5-wt-F    | tcgagGTAATTTGCTCATTTGAGTGAGGGCACTTTTTTTGTACATATG<br>ATGGGGCCAATGCACAATACTTTTATCACAgc   |
| UBR5-wt-R    | ggccgcTGTGATAAAAGTATTGTGCATTGGCCCCATCATATGTACAAA<br>AAAAGTGCCCTCACTCAAATGAGCAAATTACc   |
| ANKRD6-mut-F | tcgagAACAGGCTCAGTCAGCATCCTCACCCAGAGATGGCAACATC<br>TATTAAGACAACCTTCAATACCTTTTCATCTTCgc  |
| ANKRD6-mut-R | ggccgcGAAGATGAAAAGGTATTGAAGTTGTCTTAATAGATGTTGCC<br>ATCTCTGGGTGAGGATGCTGACTGAGCCTGTTc   |
| ARID5B-mut-F | tcgagCAGATGGCAAGGGATGCCCTCTTTTTCATAAACTCTCCAA<br>GGTTCAATAACTTCAATGTATAGTGAACTTgc      |
| ARID5B-mut-R | ggccgcAAGTTTCACTATACATTGAAGTTATTGAACCTTGGAGAGTTT<br>TATGAAAAAGAGGGGCATCCCTTGCCATCTGc   |
| ARMCX5-mut-F | tcgagCTCTGTTCTCATAAAGCCTCAAACAGTTTTTTTGGAGTTGCAA<br>TATGAAACAACCTTCATATTGTAATTATAAATgc |
| ARMCX5-mut-R | ggccgcATTTATAATTACAATATGAAGTTGTTTCATATTGCAACTCCAA<br>AAAAGTGTGAGGCTTTATGAGAACAGAGc     |
| BMP3-mut-F   | tcgagTTATTTTTATGGACTTCTTCCTGTTTTTTTTTTTTTTTTTTTGC<br>ACTGCAACTTCATTTTGTTCAAAAGATgc     |
| BMP3-mut-R   | ggccgcATCTTTTGAAACAAAATGAAGTTGCAGTGCAAAAAAAAAA<br>AAAAAAAAAACAGGAAGAAGTCCATAAAAAATAAc  |
| CDK8-mut-F   | tcgagTGTGTGGATTTGCTACTTCCATAGTTTACTTGACATGGTTCA<br>GACTGACAACTTCATTTTTTTCAGTGACAGgc    |
| CDK8-mut-R   | ggccgcCTGTCACTGAAAAAATGAAGTTGTCAGTCTGAACCATGTC<br>AAGTAACTATGGAAGTAGCAAATCCACAACAc     |
| COL4A1-mut-F | tcgagATACCAAATGGCACTTTTGATGAAATAAAATATCAATATTTTC<br>TGCAATCAACTTCACTGATGTGTGAAGTGAgc   |

| DNA Oligos   | sequence (5'-3')                                                                      |
|--------------|---------------------------------------------------------------------------------------|
| COL4A1-mut-R | ggccgcTCACTTCACACATCAGTGAAGTTGATTGCAGAAAATATTGA<br>TATTTTATTTTCATCAAAAGTGCCATTTGGTATc |
| EEF1A1-mut-F | tcgagCCATTTAAGTTTAGTAGTAAAAGACTGGTTAATGATAAATCGT<br>AAAACCTTCAGAAGGAgc                |
| EEF1A1-mut-R | ggccgcCCTTCTGAAGGTTTTACGATTTATCATTAACCAGTCTTTTAC<br>TACTAAACTTAAATGGAc                |
| GRIK2-mut-F  | tcgagTTGACAACATTGTGATAACAGTTGAGTGCACACAGTTTGCTG<br>TTTGAATCAACTTCACAAAATTAAAAAAAATgc  |
| GRIK2-mut-R  | ggccgcATTTTTTTTAAATTTTGTGAAGTTGATTCAAACAGCAAACGT<br>GTGCACTCAACTGTTATCACAATGTTGTCAAc  |
| MBD2-mut-F   | tcgagTGTAAGAAAAAAAATGTACCCGAGCACATAGAGCTTTTAAAT<br>AGCACTAACAACCTCCTTTTTTAGATGTATTTgc |
| MBD2-mut-R   | ggccgcAAATACATCTAAAAAGGAAGTTGTTAGTGCTATTAAAAAGC<br>TCTATGTGCTCGGGTACATTTTTTTTCTTACAc  |
| NPAT-mut-F   | tcgagGGGATTTAAAGAATTGCACTAATTCATAGAACTCTTTACATTG<br>TAGTGACAACTTCACATATAATTTAAATCTgc  |
| NPAT-mut-R   | ggccgcAGATTTAAATTATATGTGAAGTTGTCACTACAATGTAAAGAG<br>TTCTATGAATTAGTGCAATTCTTTAAATCCCc  |
| NTN1-mut-F   | tcgagTAAATGTTTAGTTGTGACCATGACGTATTGTTTGGGTCAATGT<br>CCCTTTCAACTTCATACTAATATATTATGGgc  |
| NTN1-mut-R   | ggccgcCCATAATATATTAGTATGAAGTTGAAAGGGACATTGACCCAA<br>ACAATACGTCATGGTCACAACTAAACATTTAc  |
| PURB-mut-F   | tcgagCTTCACTGTAAATTTTGTTTTTCATTTTAAACCAATTATGGTAC<br>TTTATCAACTTCACAACTGATCTCTCAGTgc  |
| PURB-mut-R   | ggccgcACTGAGAGATCAGTTGTGAAGTTGATAAAGTACCATAATTG<br>GGTTAAAAATGAAAACAAAATTTACAGTGAAGc  |
| RNF12-mut-F  | tcgagTTCATTTGTTTAAAAATGTAAAGCTATTTTGTAGAGGCTCAGT<br>ACTTTTCAACTTCACTGTTGTATGAATGCAgc  |

| DNA Oligos    | sequence (5'-3')                                                                      |
|---------------|---------------------------------------------------------------------------------------|
| RNF12-mut-R   | ggccgcTGCATTCATACAACAGTGAAGTTGAAAAGTACTGAGCCTCT<br>ACAAAATAGCTTTACATTTTTTAAACAAATGAAc |
| SLC35A2-mut-F | tcgagATTTTTTGGTTTGTTTTTTAAGGAACTGTAATGAACAAATGTC<br>AGGATATCAACTTCCAAATAAAGATGTTGTgc  |
| SLC35A2-mut-R | ggccgcACAACATCTTTATTTGGAAGTTGATATCCTGACATTTGTTCA<br>TTACAGTTCCTTAAAAAACAACCAAAAAATc   |
| SRGAP1-mut-F  | tcgagGACATATGTCATTTTAAGGACAATAGAAACACTTAGACTTACT<br>TGAAAATCAACTTCTGCACCACTTGTAATGgc  |
| SRGAP1-mut-R  | ggccgcCATTACAAGTGGTGCAGAAGTTGATTTTCAAGTAAGTCTAA<br>GTGTTTCTATTGTCCTTAAAATGACATATGTCc  |
| TANC2-mut-F   | tcgagGGTTTTCTATGACTCAGATGTAAAGGACTTTCTCTGTACAGTA<br>TATTATCAACTTCATGTTTGTCTCTCTCCgc   |
| TANC2-mut-R   | ggccgcGGAGAGAGAACAACATGAAGTTGATAATATACTGTACAGA<br>GAAAGTCCTTTACATCTGAGTCATAGAAAACCCc  |
| TRPS1-mut-F   | tcgagGTAGCACATTATGTTTATAATTGCACATGTGCACATAATCTATT<br>ATGATCAACTTCAAATACAGCTCCAAAAAgc  |
| TRPS1-mut-R   | ggccgcTTTTTGGAGCTGTATTTGAAGTTGATCATAATAGATTATGTG<br>CACATGTGCAATTATAAACATAATGTGCTACc  |
| UBR5-mut-F    | tcgagGTAATTTGCTCATTTGAGTGAGGGCACTTTTTTTGTACATATG<br>ATGGGGCAACTTCACAATACTTTTATCACAgc  |
| UBR5-mut-R    | ggccgcTGTGATAAAAGTATTGTGAAGTTGCCCCATCATATGTACAAA<br>AAAAGTGCCCTCACTCAAATGAGCAAATTACc  |

wt: wild type; mut: mutation; F: sense strand; R: antisense strand. Uppercase letters represent the interest sequence. Lowercase letters represent the sequence used for ligation.

**Table S3.** Sequences of miR-PC-2869 mimics and siRNAs used for RNA interference

| oligonucleotide name | Anti-sense strand (5'-3') |
|----------------------|---------------------------|
| miR-PC-2869          | CGCAUUGGUGGUUCAGUGG       |
| siCDK8               | UUUAGAAGCUCUGUGAAACdTdT   |
| Ce-siEEF1A1          | UCUUAUAUAGGUGCUGACUU      |
| Ce-siNTN1            | CACGUAGGUCACCUCGAACUU     |
| Hs-siEEF1A1          | UUCACUCAAGCUUCAUGGdTdT    |
| Hs-siNTN1            | UCACUUCGAACUUCUUGCCdTdT   |

siCDK8 is effective in both antler cartilage cells and human cells. Ce: *Cervus elaphus*; Hs: *homo sapiens*.

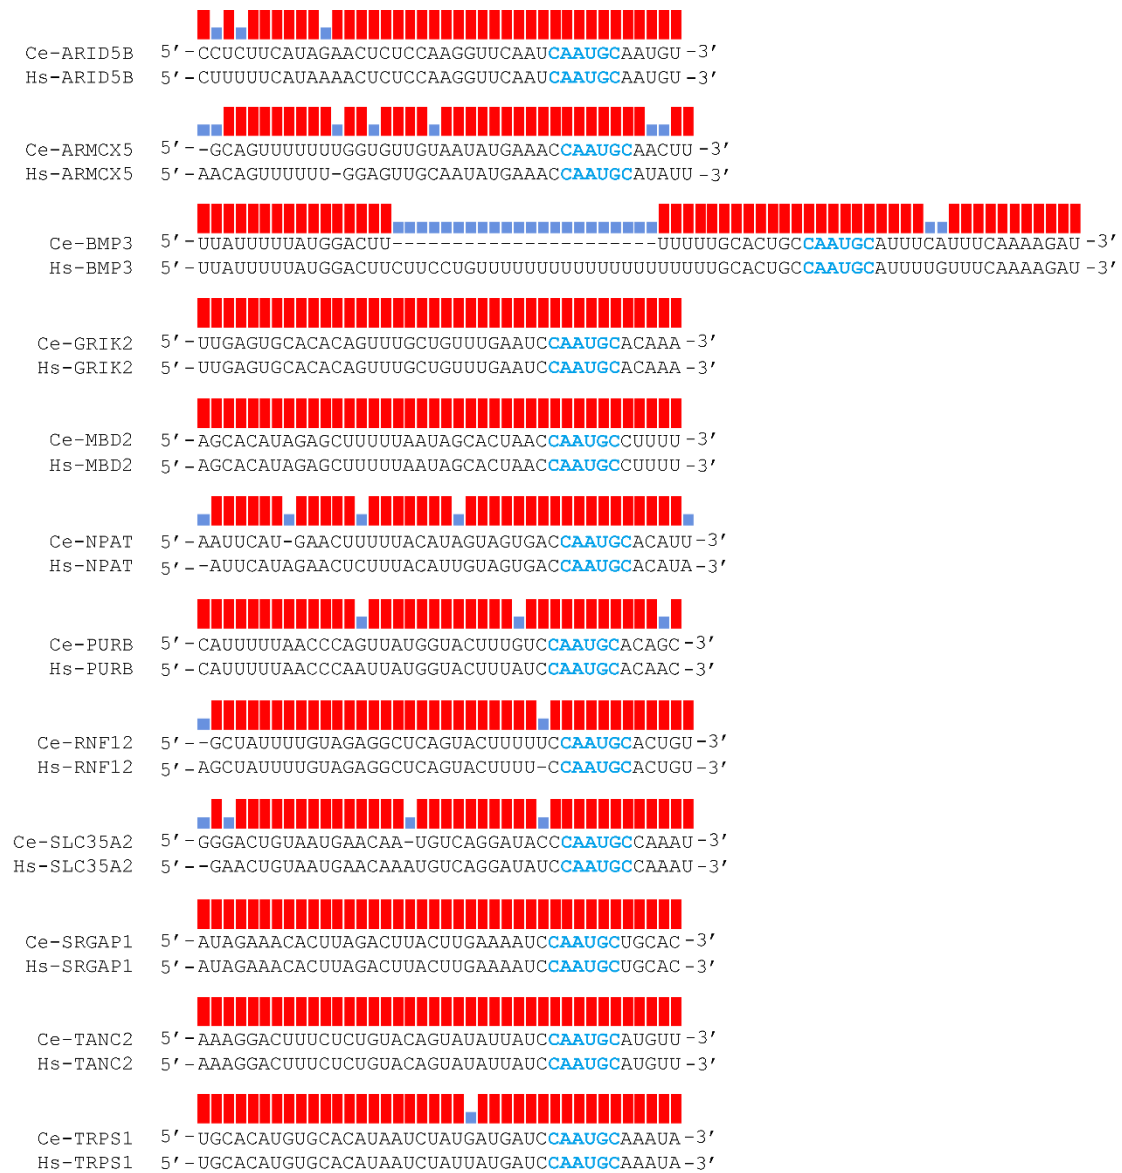

**Figure S1.** The specific sites recognized by miR-PC-2869 in 12 target genes are conserved between humans and red deer (*Cervus elaphus*). Blue bases represent the sequence complementary to the seed sequence of miR-PC-2869.
